# Supplementary material
Source: Springer Nature journal article supplement (https://www.springermedizin.de/resource/supplementary/12943_2004_80_MOESM9_ESM.pdf/9553390)

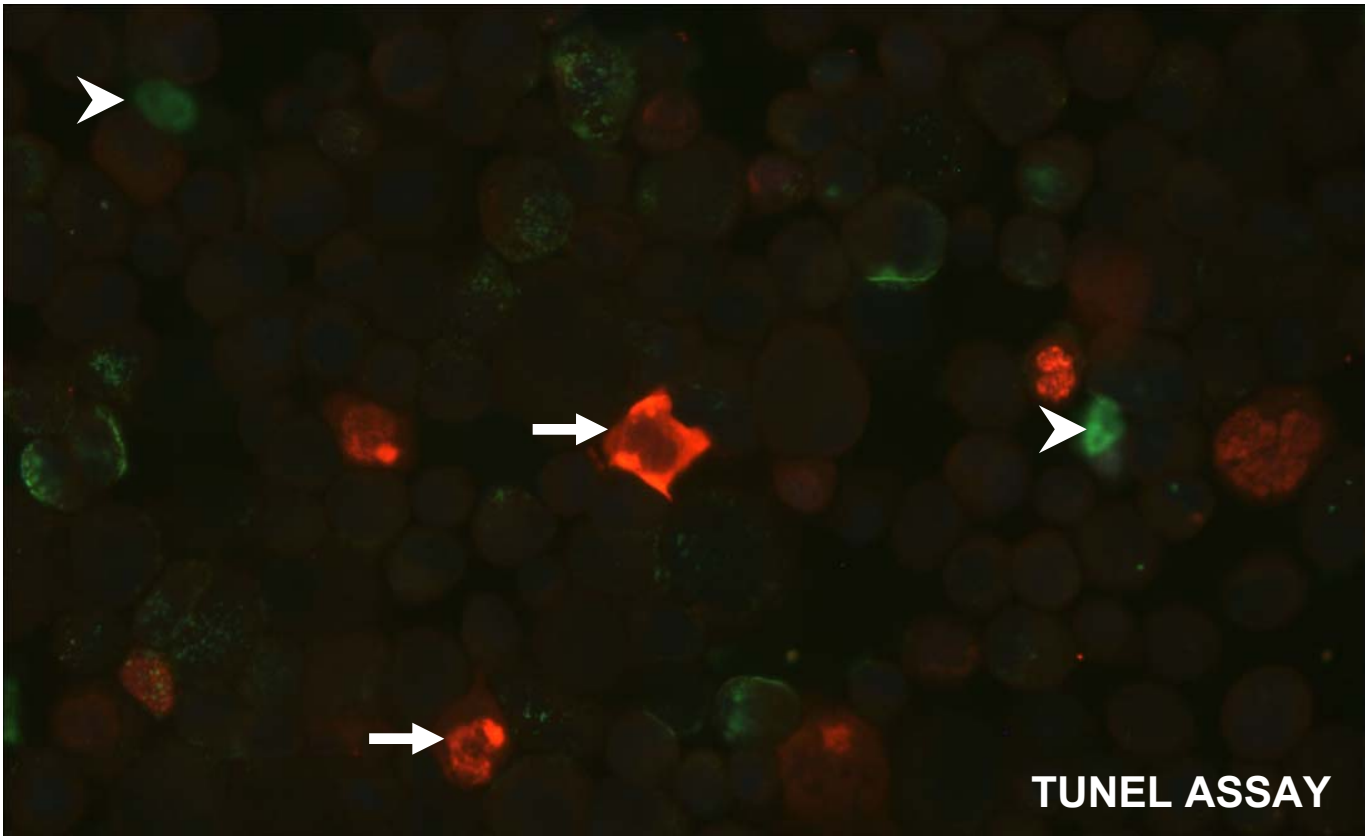

**TUNEL ASSAY**

Supplement: MOESM9 [file 9553390]
